# Supplementary material
Source: PubMed Central journal article supplement (PMC9744823)

## Supplementary Information

### Supplementary Tables

Supplementary Table 1. SUS Acute respiratory illness ICD10 code list.

| SUS Acute respiratory illness ICD10 code list |                                                                       |
|-----------------------------------------------|-----------------------------------------------------------------------|
| J04*                                          | Acute laryngitis and tracheitis                                       |
| J09*                                          | Influenza due to identified avian influenza virus                     |
| J10*                                          | Influenza with pneumonia, other influenza virus identified            |
| J11*                                          | Influenza with pneumonia, virus not identified                        |
| J12*                                          | Viral pneumonia, not elsewhere classified                             |
| J13*                                          | Pneumonia due to <i>Streptococcus pneumoniae</i>                      |
| J14*                                          | Pneumonia due to <i>Haemophilus influenzae</i>                        |
| J15*                                          | Bacterial pneumonia, not elsewhere classified                         |
| J16*                                          | Pneumonia due to other infectious organisms, not elsewhere classified |
| J17*                                          | Pneumonia in diseases classified elsewhere                            |
| J18*                                          | Pneumonia, organism unspecified                                       |
| J20*                                          | Acute bronchitis                                                      |
| J21*                                          | Acute bronchiolitis                                                   |
| J22*                                          | Unspecified acute lower respiratory infection                         |
| J80*                                          | ARDS (related to respiratory infection)                               |
| U07*                                          | COVID-19, virus identified and not identified                         |
| U04*                                          | Severe acute respiratory syndrome (SARS)                              |

Supplementary Table 2. Investigated outcomes - definitions and data sources

| Outcome                              | Definition and Data sources                                                                                                                                                                                                                                                                                                                                                                                                                                                                                                                                                                                                                                                                           |
|--------------------------------------|-------------------------------------------------------------------------------------------------------------------------------------------------------------------------------------------------------------------------------------------------------------------------------------------------------------------------------------------------------------------------------------------------------------------------------------------------------------------------------------------------------------------------------------------------------------------------------------------------------------------------------------------------------------------------------------------------------|
| Symptomatic disease                  | Table 3, Supplementary Table 4. Cases were identified from community testing data only (Pillar 2) and were restricted to persons who had reported symptoms and gave a symptom onset date within the 10 days before testing. These VE estimates reflect protection against mild disease.                                                                                                                                                                                                                                                                                                                                                                                                               |
| Hospitalisation (primary analysis)   | Figure 1, Table 4. The primary hospitalisation analysis estimated VE using Pillar 1 and Pillar 2 tests which could be linked to the SUS hospitalisation records. Pillar 2 tests were identified where the sample was taken 14 days before and up to 2 days after the day of admission. Pillar 1 tests were included where the sample was taken 1 day before and up to 2 days after the admission. Only tests linked to an admission with a respiratory code in the primary diagnosis field and where the length of stay was at least 2 days were included. These VE estimates reflect protection against hospitalisation using a strict definition to limit contamination with incidental admissions. |
| Hospitalisation (secondary analysis) | Supplementary Table 5. The secondary hospitalisation analysis estimated VE in a subset of Pillar 2 community tests from symptomatic individuals; those for which an admission to accident and emergency (ECDS) occurred in the 14 days after their test date. These VE estimates reflect protection against hospitalisation using a broader definition which may include contamination with incidental admissions and therefore be more reflective of VE against mild disease.                                                                                                                                                                                                                        |

Supplementary Table 3. Descriptive characteristics of those included in the VE analysis for protection against symptomatic disease (cases all) and hospitalisation as assessed using the ECDS data following infection with either Delta or Omicron variants.

|                    |                            |                 | Delta    |         |           |       |            |       | Omicron  |         |           |         |            |       |       |
|--------------------|----------------------------|-----------------|----------|---------|-----------|-------|------------|-------|----------|---------|-----------|---------|------------|-------|-------|
|                    |                            |                 | Controls |         | Cases All |       | Cases Hosp |       | Controls |         | Cases All |         | Cases Hosp |       |       |
| Dose               | Booster manufacturer       | Interval (days) | n        | %       | n         | %     | n          | %     | n        | %       | n         | %       | n          | %     |       |
|                    |                            |                 | 469,976  |         | 172,223   |       | 1,352      |       | 457,377  |         | 434,514   |         | 509        |       |       |
| Vaccination Status | Unvaccinated               |                 | 49,918   | 10.6%   | 48,699    | 28.3% | 366        | 27.1% | 29,062   | 6.4%    | 53,626    | 12.3%   | 93         | 18.3% |       |
|                    | Dose 2*                    | 175+            | 142,454  | 30.3%   | 92,917    | 54.0% | 809        | 59.8% | 89,641   | 19.6%   | 92,283    | 21.2%   | 84         | 16.5% |       |
|                    | Booster                    | Any             | 51,109   | 10.9%   | 21,257    | 12.3% | 96         | 7.1%  | 40,877   | 8.9%    | 29,617    | 6.8%    | 5          | 1.0%  |       |
|                    | Booster                    | BNT162b2        | 7+       | 225,962 | 48.1%     | 9,303 | 5.4%       | 76    | 5.6%     | 297,056 | 64.9%     | 258,297 | 59.4%      | 320   | 62.9% |
|                    | Booster                    | ChAdOx1-S       | 7+       | 533     | 0.1%      | 47    | 0.0%       | 5     | 0.4%     | 741     | 0.2%      | 691     | 0.2%       | 7     | 1.4%  |
| Gender             | Female                     |                 | 284,136  | 60.5%   | 91,669    | 53.2% | 624        | 46.2% | 274,565  | 60.0%   | 230,789   | 53.1%   | 250        | 49.1% |       |
|                    | Male                       |                 | 185,025  | 39.4%   | 80,291    | 46.6% | 728        | 53.8% | 182,025  | 39.8%   | 203,031   | 46.7%   | 258        | 50.7% |       |
|                    | Missing                    |                 | 815      | 0.2%    | 263       | 0.2%  | 0          | 0.0%  | 787      | 0.2%    | 694       | 0.2%    | 1          | 0.2%  |       |
| Age                | 40-44                      |                 | 80,921   | 17.2%   | 35,639    | 20.7% | 0          | 0.0%  | 83,475   | 18.3%   | 94,518    | 21.8%   | 0          | 0.0%  |       |
|                    | 45-49                      |                 | 74,782   | 15.9%   | 30,300    | 17.6% | 0          | 0.0%  | 78,924   | 17.3%   | 86,768    | 20.0%   | 0          | 0.0%  |       |
|                    | 50-54                      |                 | 89,098   | 19.0%   | 32,587    | 18.9% | 0          | 0.0%  | 90,779   | 19.8%   | 87,744    | 20.2%   | 0          | 0.0%  |       |
|                    | 55-59                      |                 | 76,254   | 16.2%   | 25,591    | 14.9% | 0          | 0.0%  | 75,520   | 16.5%   | 67,858    | 15.6%   | 0          | 0.0%  |       |
|                    | 60-64                      |                 | 55,023   | 11.7%   | 18,038    | 10.5% | 0          | 0.0%  | 52,087   | 11.4%   | 41,777    | 9.6%    | 0          | 0.0%  |       |
|                    | 65-69                      |                 | 40,628   | 8.6%    | 12,894    | 7.5%  | 405        | 30.0% | 34,908   | 7.6%    | 24,659    | 5.7%    | 116        | 22.8% |       |
|                    | 70-74                      |                 | 30,900   | 6.6%    | 10,104    | 5.9%  | 405        | 30.0% | 24,787   | 5.4%    | 18,125    | 4.2%    | 134        | 26.3% |       |
|                    | 75-79                      |                 | 14,709   | 3.1%    | 4,876     | 2.8%  | 275        | 20.3% | 11,152   | 2.4%    | 8,756     | 2.0%    | 103        | 20.2% |       |
|                    | 80-84                      |                 | 4,094    | 0.9%    | 1,269     | 0.7%  | 144        | 10.7% | 3,064    | 0.7%    | 2,332     | 0.5%    | 64         | 12.6% |       |
|                    | 85-89                      |                 | 1,999    | 0.4%    | 580       | 0.3%  | 81         | 6.0%  | 1,518    | 0.3%    | 1,107     | 0.3%    | 49         | 9.6%  |       |
| 90+                |                            | 1,568           | 0.3%     | 345     | 0.2%      | 42    | 3.1%       | 1,163 | 0.3%     | 870     | 0.2%      | 43      | 8.4%       |       |       |
| Ethnicity          | African                    |                 | 3,922    | 0.8%    | 1,291     | 0.7%  | 14         | 1.0%  | 3,701    | 0.8%    | 5,492     | 1.3%    | 5          | 1.0%  |       |
|                    | Any other Asian background |                 | 5,405    | 1.2%    | 1,668     | 1.0%  | 14         | 1.0%  | 5,437    | 1.2%    | 6,253     | 1.4%    | 6          | 1.2%  |       |
|                    | Any other Black background |                 | 1,810    | 0.4%    | 787       | 0.5%  | 4          | 0.3%  | 1,590    | 0.3%    | 2,617     | 0.6%    | 0          | 0.0%  |       |

|               |                                    |         |       |         |       |       |       |         |       |         |       |     |       |
|---------------|------------------------------------|---------|-------|---------|-------|-------|-------|---------|-------|---------|-------|-----|-------|
|               | Any other White background         | 30,310  | 6.4%  | 16,093  | 9.3%  | 89    | 6.6%  | 29,473  | 6.4%  | 39,506  | 9.1%  | 29  | 5.7%  |
|               | Any other ethnic group             | 6,239   | 1.3%  | 2,579   | 1.5%  | 12    | 0.9%  | 6,242   | 1.4%  | 7,630   | 1.8%  | 10  | 2.0%  |
|               | Any other mixed background         | 1,945   | 0.4%  | 774     | 0.4%  | 7     | 0.5%  | 1,894   | 0.4%  | 2,038   | 0.5%  | 2   | 0.4%  |
|               | Bangladeshi or British Bangladeshi | 1,743   | 0.4%  | 678     | 0.4%  | 9     | 0.7%  | 1,741   | 0.4%  | 2,198   | 0.5%  | 4   | 0.8%  |
|               | British, Mixed British             | 355,004 | 75.5% | 123,459 | 71.7% | 1,036 | 76.6% | 345,349 | 75.5% | 302,173 | 69.5% | 383 | 75.2% |
|               | Caribbean                          | 2,847   | 0.6%  | 1,443   | 0.8%  | 16    | 1.2%  | 2,474   | 0.5%  | 4,463   | 1.0%  | 9   | 1.8%  |
|               | Chinese                            | 1,451   | 0.3%  | 490     | 0.3%  | 7     | 0.5%  | 1,503   | 0.3%  | 1,453   | 0.3%  | 3   | 0.6%  |
|               | Indian or British Indian           | 12,668  | 2.7%  | 3,191   | 1.9%  | 29    | 2.1%  | 12,322  | 2.7%  | 11,073  | 2.5%  | 7   | 1.4%  |
|               | Irish                              | 3,313   | 0.7%  | 921     | 0.5%  | 7     | 0.5%  | 3,170   | 0.7%  | 2,649   | 0.6%  | 10  | 2.0%  |
|               | Pakistani or British Pakistani     | 5,791   | 1.2%  | 2,145   | 1.2%  | 19    | 1.4%  | 5,770   | 1.3%  | 7,135   | 1.6%  | 10  | 2.0%  |
|               | White and Asian                    | 832     | 0.2%  | 301     | 0.2%  | 0     | 0.0%  | 865     | 0.2%  | 834     | 0.2%  | 0   | 0.0%  |
|               | White and Black African            | 656     | 0.1%  | 255     | 0.1%  | 0     | 0.0%  | 655     | 0.1%  | 850     | 0.2%  | 1   | 0.2%  |
|               | White and Black Caribbean          | 915     | 0.2%  | 404     | 0.2%  | 4     | 0.3%  | 840     | 0.2%  | 1,284   | 0.3%  | 2   | 0.4%  |
|               | Missing                            | 35,125  | 7.5%  | 15,744  | 9.1%  | 85    | 6.3%  | 34,351  | 7.5%  | 36,866  | 8.5%  | 28  | 5.5%  |
| NHS Region    | East of England                    | 55,371  | 11.8% | 19,965  | 11.6% | 127   | 9.4%  | 54,106  | 11.8% | 44,943  | 10.3% | 46  | 9.0%  |
|               | London                             | 56,857  | 12.1% | 18,455  | 10.7% | 121   | 8.9%  | 55,327  | 12.1% | 61,545  | 14.2% | 59  | 11.6% |
|               | Midlands                           | 89,571  | 19.1% | 33,599  | 19.5% | 274   | 20.3% | 87,072  | 19.0% | 82,976  | 19.1% | 100 | 19.6% |
|               | North East                         | 70,243  | 14.9% | 27,797  | 16.1% | 287   | 21.2% | 66,238  | 14.5% | 69,399  | 16.0% | 98  | 19.3% |
|               | North West                         | 65,199  | 13.9% | 23,730  | 13.8% | 180   | 13.3% | 60,400  | 13.2% | 71,916  | 16.6% | 101 | 19.8% |
|               | South East                         | 82,624  | 17.6% | 28,623  | 16.6% | 210   | 15.5% | 85,855  | 18.8% | 70,342  | 16.2% | 69  | 13.6% |
|               | South West                         | 50,110  | 10.7% | 20,054  | 11.6% | 153   | 11.3% | 48,378  | 10.6% | 33,393  | 7.7%  | 36  | 7.1%  |
|               | Missing                            | 1       | 0.0%  | 0       | 0.0%  | 0     | 0.0%  | 1       | 0.0%  | 0       | 0.0%  | 0   | 0.0%  |
| IMD Quintiles | 1                                  | 72,363  | 15.4% | 28,710  | 16.7% | 284   | 21.0% | 68,334  | 14.9% | 81,965  | 18.9% | 117 | 23.0% |
|               | 2                                  | 84,074  | 17.9% | 32,208  | 18.7% | 275   | 20.3% | 80,641  | 17.6% | 84,654  | 19.5% | 109 | 21.4% |
|               | 3                                  | 96,109  | 20.4% | 35,481  | 20.6% | 279   | 20.6% | 93,614  | 20.5% | 85,615  | 19.7% | 102 | 20.0% |
|               | 4                                  | 104,605 | 22.3% | 37,662  | 21.9% | 278   | 20.6% | 102,289 | 22.4% | 90,030  | 20.7% | 101 | 19.8% |
|               | 5                                  | 111,956 | 23.8% | 37,790  | 21.9% | 232   | 15.5% | 111,706 | 24.4% | 91,371  | 21.0% | 80  | 13.6% |
|               | Missing                            | 869     | 0.2%  | 372     | 0.2%  | 4     | 0.3%  | 793     | 0.2%  | 879     | 0.2%  | 0   | 0.0%  |

|                         |                           |         |       |         |       |       |       |         |       |         |       |     |       |
|-------------------------|---------------------------|---------|-------|---------|-------|-------|-------|---------|-------|---------|-------|-----|-------|
| Previously positive     | No                        | 410,326 | 87.3% | 169,930 | 98.7% | 1,347 | 99.6% | 391,382 | 85.6% | 395,115 | 90.9% | 490 | 96.3% |
|                         | Yes                       | 59,650  | 12.7% | 2,293   | 1.3%  | 5     | 0.4%  | 65,995  | 14.4% | 39,399  | 9.1%  | 19  | 3.7%  |
| Vaccine priority groups | Healthcare worker         | 18,031  | 3.8%  | 4,068   | 2.4%  | 4     | 0.3%  | 14,693  | 3.2%  | 11,743  | 2.7%  | 1   | 0.2%  |
|                         | CEV**                     | 44,973  | 9.6%  | 13,147  | 7.6%  | 475   | 35.1% | 38,131  | 8.3%  | 32,486  | 7.5%  | 280 | 55.0% |
|                         | At risk***                | 119,372 | 25.4% | 40,186  | 23.3% | 14    | 1.0%  | 111,789 | 24.4% | 95,944  | 22.1% | 3   | 0.6%  |
|                         | Severely immunosuppressed | 5,571   | 1.2%  | 1,871   | 1.1%  | 116   | 8.6%  | 4,994   | 1.1%  | 5,734   | 1.3%  | 83  | 16.3% |

\* ChAdOx1-S primary course

\*\* CEV: clinically extremely vulnerable

\*\*\*At risk is only those under 65

Supplementary Table 4. Effectiveness of the ChAdOx1-S and BNT162b2 booster vaccines against symptomatic disease following infection with the Delta variant for adults aged 40 years and older in England.

| Dose         | Booster Manufacturer | Interval (days) | Controls | Cases  | OR*              | VE** (95% CI)       |
|--------------|----------------------|-----------------|----------|--------|------------------|---------------------|
| Age 40-64    |                      |                 |          |        |                  |                     |
| Unvaccinated |                      |                 | 47,233   | 46,399 | Baseline         | Baseline            |
| Dose 2***    |                      | 175+            | 121,274  | 73,031 | 0.58 (0.57-0.60) | 41.7 (40.5 to 42.8) |
| Booster      | Any****              | 0-6             | 45,607   | 16,762 | 0.48 (0.47-0.50) | 51.5 (50.2 to 52.8) |
|              | BNT162b2             | 7+              | 161,582  | 5,940  | 0.08 (0.08-0.08) | 91.9 (91.6 to 92.1) |
|              | ChAdOx1-S            | 7+              | 382      | 23     | 0.15 (0.09-0.23) | 85.4 (77.4 to 90.6) |
| Age 65+      |                      |                 |          |        |                  |                     |
| Unvaccinated |                      |                 | 2,685    | 2,300  | Baseline         | Baseline            |
| Dose 2***    |                      | 175+            | 21,180   | 19,886 | 0.67 (0.63-0.72) | 32.8 (28.0 to 37.3) |
| Booster      | Any****              | 0-6             | 5,502    | 4,495  | 0.61 (0.57-0.66) | 38.7 (33.7 to 43.3) |
|              | BNT162b2             | 7+              | 64,380   | 3,363  | 0.1 (0.09-0.11)  | 90.2 (89.4 to 90.9) |
|              | ChAdOx1-S            | 7+              | 151      | 24     | 0.44 (0.27-0.70) | 56.3 (30.0 to 72.7) |

\*Odds ratio

\*\*Vaccine effectiveness

\*\*\*ChAdOx1-S primary course

\*\*\*\*ChAdOx1-S or BNT162b2

Supplementary Table 5. Effectiveness of the ChAdOx1-S and BNT162b2 booster vaccines against hospitalisation as defined by linkage to the accident and emergency (ECDS) data following infection with Delta or Omicron variants in adults aged 65 years and older in England.

| Dose         | Booster Manufacturer | Interval (days) | Controls | Cases | OR*              | VE** (95% CI)       |
|--------------|----------------------|-----------------|----------|-------|------------------|---------------------|
| Delta        |                      |                 |          |       |                  |                     |
| Unvaccinated |                      |                 | 2,685    | 366   | Baseline         | Baseline            |
| Dose 2***    |                      | 175+            | 21180    | 809   | 0.17 (0.15-0.2)  | 82.8 (79.9 to 85.3) |
| Booster      | Any****              | 0-6             | 5,502    | 96    | 0.09 (0.07-0.12) | 91.0 (88.5 to 93.0) |
|              | BNT162b2             | 7+              | 64380    | 76    | 0.01 (0.01-0.02) | 98.8 (98.4 to 99.1) |
|              | ChAdOx1-S            | 7+              | 151      | 5     | 0.35 (0.13-0.91) | 65.3 (8.7 to 86.8)  |
| Omicron      |                      |                 |          |       |                  |                     |
| Unvaccinated |                      |                 | 1,561    | 93    | Baseline         | Baseline            |
| Dose 2***    |                      | 175+            | 4329     | 84    | 0.45 (0.32-0.63) | 55.4 (37.2 to 68.4) |
| Booster      | Any****              | 0-6             | 1,567    | 5     | 0.15 (0.06-0.38) | 85.2 (61.7 to 94.3) |
|              | BNT162b2             | 7+              | 63803    | 320   | 0.08 (0.06-0.1)  | 92.3 (89.8 to 94.2) |
|              | ChAdOx1-S            | 7+              | 173      | 7     | 0.34 (0.15-0.8)  | 65.9 (19.9 to 85.4) |

\*Odds ratio

\*\*Vaccine effectiveness

\*\*\*ChAdOx1-S primary course

\*\*\*\*ChAdOx1-S or BNT162b2

Supplementary Table 6. Descriptive characteristics of those included in the VE analysis for protection against hospitalisation as assessed using the SUS data following infection with either Delta or Omicron variants.

|                    |                            |                 | Delta   |        |          |       |       |        | Omicron |        |          |       |       |       |       |
|--------------------|----------------------------|-----------------|---------|--------|----------|-------|-------|--------|---------|--------|----------|-------|-------|-------|-------|
|                    |                            |                 | Overall |        | Controls |       | Cases |        | Overall |        | Controls |       | Cases |       |       |
| Dose               | Booster manufacturer       | Interval (days) | n       | %      | n        | %     | n     | %      | n       | %      | n        | %     | n     | %     |       |
|                    |                            |                 | 23,227  | 100.0% | 17,377   | 74.8% | 5,850 | 25.2%  | 11,052  | 100.0% | 9,021    | 81.6% | 2,031 | 18.4% |       |
| Vaccination Status | Unvaccinated               |                 | 3,327   | 14.3%  | 1,327    | 7.6%  | 2,000 | 34.2%  | 1,120   | 10.1%  | 517      | 5.7%  | 603   | 29.7% |       |
|                    | Dose 2*                    | 175+            | 10,248  | 44.1%  | 7,000    | 40.3% | 3,248 | 55.52% | 2,026   | 18.3%  | 1,596    | 17.7% | 430   | 21.2% |       |
|                    | Booster                    | Any             | 0-6     | 1,366  | 5.9%     | 1,123 | 6.5%  | 243    | 4.15%   | 388    | 3.5%     | 361   | 4.0%  | 27    | 1.3%  |
|                    | Booster                    | BNT162b2        | 7+      | 8,239  | 35.5%    | 7,884 | 45.4% | 355    | 6.07%   | 7,448  | 67.4%    | 6,495 | 72.0% | 953   | 46.9% |
|                    | Booster                    | ChAdOx1-S       | 7+      | 47     | 0.2%     | 43    | 0.2%  | 4      | 0.07%   | 70     | 0.6%     | 52    | 0.6%  | 18    | 0.9%  |
| Pillar             | Pillar 1                   |                 | 20,960  | 90.2%  | 16,976   | 97.7% | 3,984 | 68.1%  | 10,374  | 93.9%  | 8,810    | 97.7% | 1,564 | 77.0% |       |
|                    | Pillar 2                   |                 | 2,267   | 9.8%   | 401      | 2.3%  | 1,866 | 31.9%  | 678     | 6.1%   | 211      | 2.3%  | 467   | 23.0% |       |
| Gender             | Female                     |                 | 12,333  | 53.1%  | 9,594    | 55.2% | 2,739 | 46.8%  | 5,955   | 53.9%  | 4,940    | 54.8% | 1,015 | 50.0% |       |
|                    | Male                       |                 | 10,806  | 46.5%  | 7,699    | 44.3% | 3,107 | 53.1%  | 5,041   | 45.6%  | 4,028    | 44.7% | 1,013 | 49.9% |       |
|                    | Missing                    |                 | 88      | 0.4%   | 84       | 0.5%  | 4     | 0.1%   | 56      | 0.5%   | 53       | 0.6%  | 3     | 0.1%  |       |
| Age                | 65-69                      |                 | 3,147   | 13.5%  | 1,896    | 10.9% | 1,251 | 21.4%  | 1,389   | 12.6%  | 1,096    | 12.1% | 293   | 14.4% |       |
|                    | 70-74                      |                 | 4,590   | 19.8%  | 3,106    | 17.9% | 1,484 | 25.4%  | 2,120   | 19.2%  | 1,683    | 18.7% | 437   | 21.5% |       |
|                    | 75-79                      |                 | 4,696   | 20.2%  | 3,446    | 19.8% | 1,250 | 21.4%  | 2,223   | 20.1%  | 1,815    | 20.1% | 408   | 20.1% |       |
|                    | 80-84                      |                 | 3,514   | 15.1%  | 2,691    | 15.5% | 823   | 14.1%  | 1,709   | 15.5%  | 1,363    | 15.1% | 346   | 17.0% |       |
|                    | 85-89                      |                 | 3,526   | 15.2%  | 2,924    | 16.8% | 602   | 10.3%  | 1,731   | 15.7%  | 1,440    | 16.0% | 291   | 14.3% |       |
|                    | 90+                        |                 | 3,754   | 16.2%  | 3,314    | 19.1% | 440   | 7.5%   | 1,880   | 17.0%  | 1,624    | 18.0% | 256   | 12.6% |       |
| Ethnicity          | African                    |                 | 127     | 0.5%   | 62       | 0.4%  | 65    | 1.1%   | 55      | 0.5%   | 23       | 0.3%  | 32    | 1.6%  |       |
|                    | Any other Asian background |                 | 154     | 0.7%   | 89       | 0.5%  | 65    | 1.1%   | 71      | 0.6%   | 47       | 0.5%  | 24    | 1.2%  |       |
|                    | Any other Black background |                 | 65      | 0.3%   | 34       | 0.2%  | 31    | 0.5%   | 35      | 0.3%   | 20       | 0.2%  | 15    | 0.7%  |       |
|                    | Any other White background |                 | 1,084   | 4.7%   | 746      | 4.3%  | 338   | 5.8%   | 490     | 4.4%   | 371      | 4.1%  | 119   | 5.9%  |       |
|                    | Any other ethnic group     |                 | 199     | 0.9%   | 125      | 0.7%  | 74    | 1.3%   | 83      | 0.8%   | 58       | 0.6%  | 25    | 1.2%  |       |
|                    | Any other mixed background |                 | 54      | 0.2%   | 40       | 0.2%  | 14    | 0.2%   | 31      | 0.3%   | 21       | 0.2%  | 10    | 0.5%  |       |



|                     |                                    |        |       |        |       |       |       |       |       |       |       |       |       |
|---------------------|------------------------------------|--------|-------|--------|-------|-------|-------|-------|-------|-------|-------|-------|-------|
|                     | Bangladeshi or British Bangladeshi | 61     | 0.3%  | 37     | 0.2%  | 24    | 0.4%  | 28    | 0.3%  | 18    | 0.2%  | 10    | 0.5%  |
|                     | British, Mixed British             | 19,165 | 82.5% | 14,768 | 85.0% | 4,397 | 75.2% | 9,137 | 82.7% | 7,647 | 84.8% | 1,490 | 73.4% |
|                     | Caribbean                          | 240    | 1.0%  | 94     | 0.5%  | 146   | 2.5%  | 133   | 1.2%  | 54    | 0.6%  | 79    | 3.9%  |
|                     | Chinese                            | 40     | 0.2%  | 15     | 0.1%  | 25    | 0.4%  | 13    | 0.1%  | 6     | 0.1%  | 7     | 0.3%  |
|                     | Indian or British Indian           | 323    | 1.4%  | 209    | 1.2%  | 114   | 1.9%  | 160   | 1.4%  | 109   | 1.2%  | 51    | 2.5%  |
|                     | Irish                              | 231    | 1.0%  | 185    | 1.1%  | 46    | 0.8%  | 123   | 1.1%  | 99    | 1.1%  | 24    | 1.2%  |
|                     | Pakistani or British Pakistani     | 291    | 1.3%  | 169    | 1.0%  | 122   | 2.1%  | 148   | 1.3%  | 96    | 1.1%  | 52    | 2.6%  |
|                     | White and Asian                    | 14     | 0.1%  | 9      | 0.1%  | 5     | 0.1%  | 4     | 0.0%  | 3     | 0.0%  | 1     | 0.0%  |
|                     | White and Black African            | 10     | 0.0%  | 6      | 0.0%  | 4     | 0.1%  | 5     | 0.0%  | 5     | 0.1%  | 0     | 0.0%  |
|                     | White and Black Caribbean          | 39     | 0.2%  | 21     | 0.1%  | 18    | 0.3%  | 18    | 0.2%  | 9     | 0.1%  | 9     | 0.4%  |
|                     | Missing                            | 1,130  | 4.9%  | 768    | 4.4%  | 362   | 6.2%  | 518   | 4.7%  | 435   | 4.8%  | 83    | 4.1%  |
| NHS Region          | East of England                    | 2,549  | 11.0% | 1,997  | 11.5% | 552   | 9.4%  | 1,133 | 10.3% | 972   | 10.8% | 161   | 7.9%  |
|                     | London                             | 2,390  | 10.3% | 1,704  | 9.8%  | 686   | 11.7% | 1,152 | 10.4% | 798   | 8.8%  | 354   | 17.4% |
|                     | Midlands                           | 4,749  | 20.4% | 3,554  | 20.5% | 1,195 | 20.4% | 2,451 | 22.2% | 2,012 | 22.3% | 439   | 21.6% |
|                     | North East                         | 4,433  | 19.1% | 3,172  | 18.3% | 1,261 | 21.6% | 2,039 | 18.4% | 1,662 | 18.4% | 377   | 18.6% |
|                     | North West                         | 3,376  | 14.5% | 2,546  | 14.7% | 830   | 14.2% | 1,678 | 15.2% | 1,312 | 14.5% | 366   | 18.0% |
|                     | South East                         | 3,412  | 14.7% | 2,697  | 15.5% | 715   | 12.2% | 1,621 | 14.7% | 1,406 | 15.6% | 215   | 10.6% |
|                     | South West                         | 2,318  | 10.0% | 1,707  | 9.8%  | 611   | 10.4% | 978   | 8.8%  | 859   | 9.5%  | 119   | 5.9%  |
| IMD Quintiles       | 1                                  | 5,443  | 23.4% | 3,913  | 22.5% | 1,530 | 26.2% | 2,727 | 24.7% | 2,095 | 23.2% | 632   | 31.1% |
|                     | 2                                  | 4,862  | 20.9% | 3,590  | 20.7% | 1,272 | 21.7% | 2,293 | 20.7% | 1,833 | 20.3% | 460   | 22.6% |
|                     | 3                                  | 4,575  | 19.7% | 3,441  | 19.8% | 1,134 | 19.4% | 2,118 | 19.2% | 1,739 | 19.3% | 379   | 18.7% |
|                     | 4                                  | 4,583  | 19.7% | 3,532  | 20.3% | 1,051 | 18.0% | 2,167 | 19.6% | 1,841 | 20.4% | 326   | 16.1% |
|                     | 5                                  | 3,718  | 16.0% | 2,873  | 16.5% | 845   | 14.4% | 1,723 | 15.6% | 1,496 | 16.6% | 227   | 11.2% |
|                     | Missing                            | 46     | 0.2%  | 28     | 0.2%  | 18    | 0.3%  | 24    | 0.2%  | 17    | 0.2%  | 7     | 0.3%  |
| Previously positive | No                                 | 20,958 | 90.2% | 15,158 | 87.2% | 5,800 | 99.1% | 9,717 | 87.9% | 7,786 | 86.3% | 1,931 | 95.1% |
|                     | Yes                                | 2,269  | 9.8%  | 2,219  | 12.8% | 50    | 0.9%  | 1,335 | 12.1% | 1,235 | 13.7% | 100   | 4.9%  |
|                     | HSCW**                             | 16     | 0.1%  | 12     | 0.1%  | 4     | 0.1%  | 6     | 0.1%  | 5     | 0.1%  | 1     | 0.0%  |

|                               |                           |        |       |       |       |       |       |       |       |       |       |       |       |
|-------------------------------|---------------------------|--------|-------|-------|-------|-------|-------|-------|-------|-------|-------|-------|-------|
| Vaccine<br>priority<br>groups | CEV***                    | 12,340 | 53.1% | 9,915 | 57.1% | 2,425 | 41.5% | 6,188 | 56.0% | 5,046 | 55.9% | 1,142 | 56.2% |
|                               | At<br>risk****            | 115    | 0.5%  | 69    | 0.4%  | 46    | 0.8%  | 55    | 0.5%  | 47    | 0.5%  | 8     | 0.4%  |
|                               | Severely immunosuppressed | 1,967  | 8.5%  | 1,510 | 8.7%  | 457   | 7.8%  | 1,022 | 9.2%  | 795   | 8.8%  | 227   | 11.2% |

\* ChAdOx1-S primary course

\*\*HSCW: health and social care worker

\*\*\* CEV: clinically extremely vulnerable

\*\*\*\*At risk is only those under 65 years

## Supplementary Figures

### Supplementary Figure 1. Flow chart of the data linkage methodology.

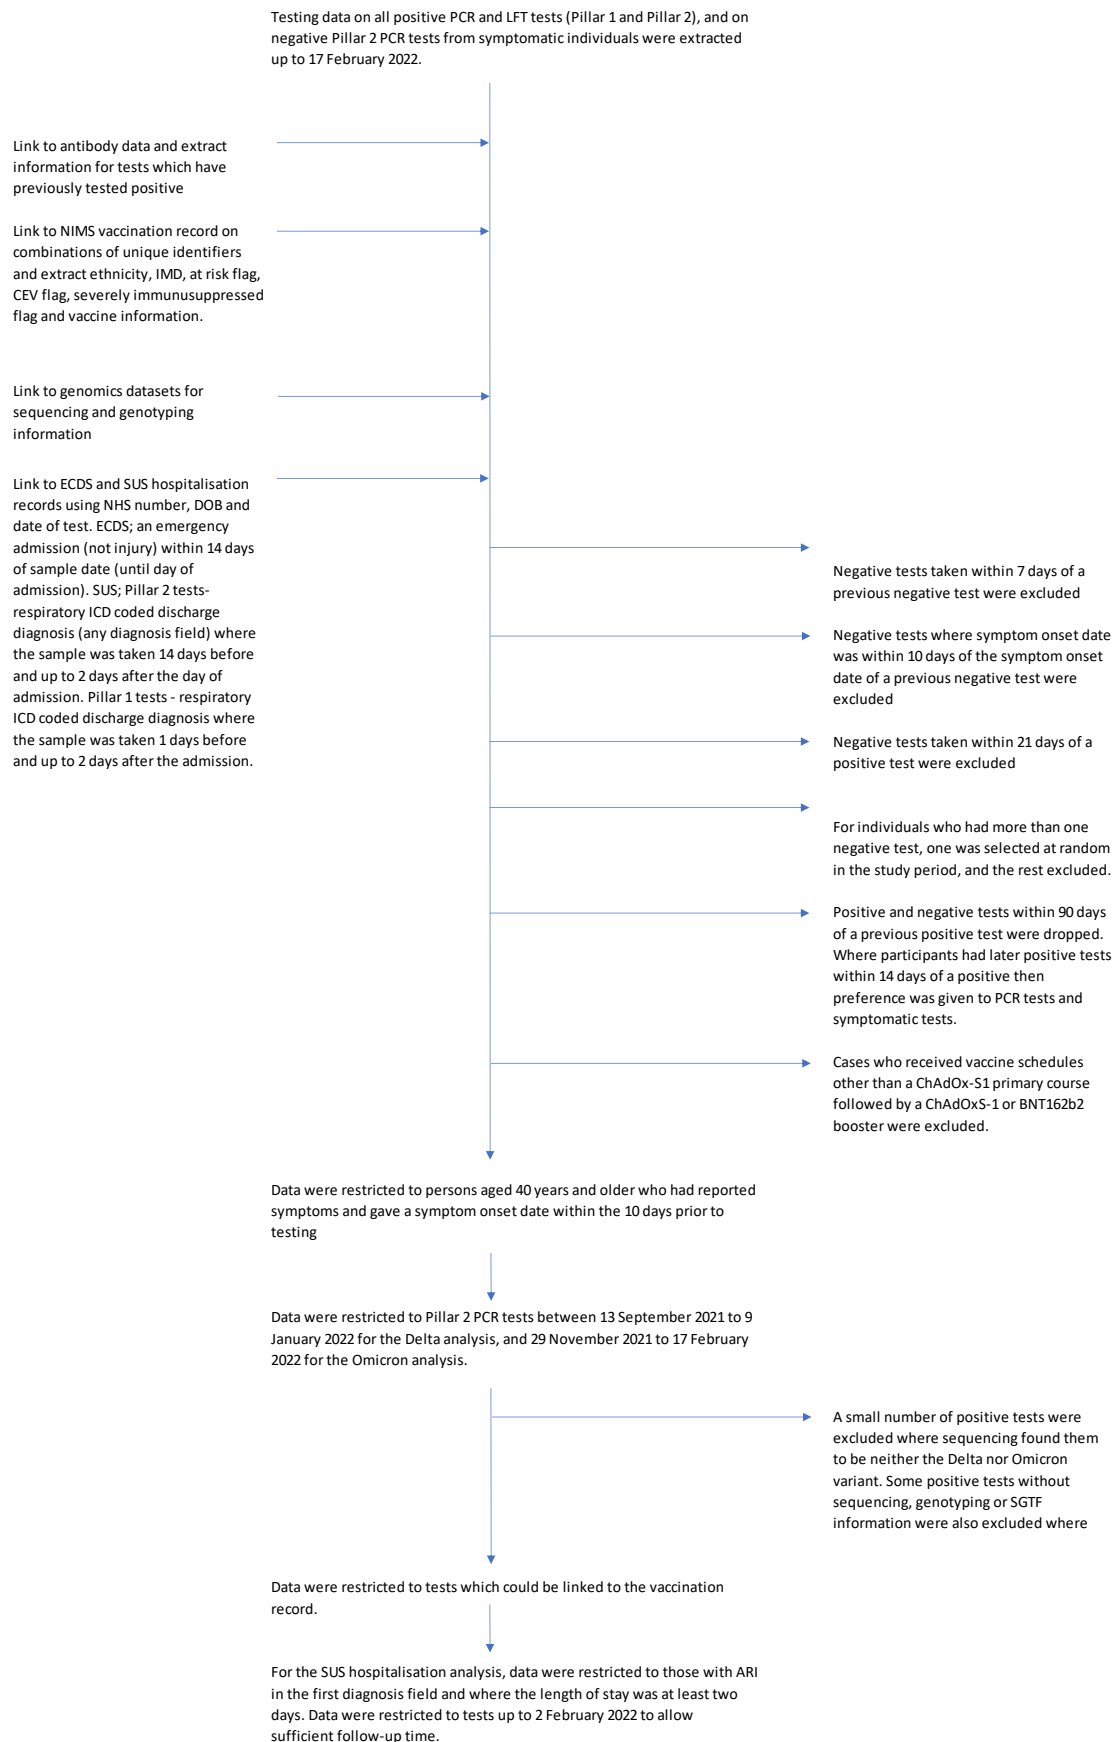

Supplement: 41467_2022_35168_MOESM1_ESM.pdf [file 41467_2022_35168_MOESM1_ESM.pdf]
